# Supplementary figures and images for: Monitoring Rainfed Alfalfa Growth in Semiarid Agrosystems Using Sentinel-2 Imagery
Source: MDPI journal article supplement (doi:10.3390/rs13224719), 2021-11-22

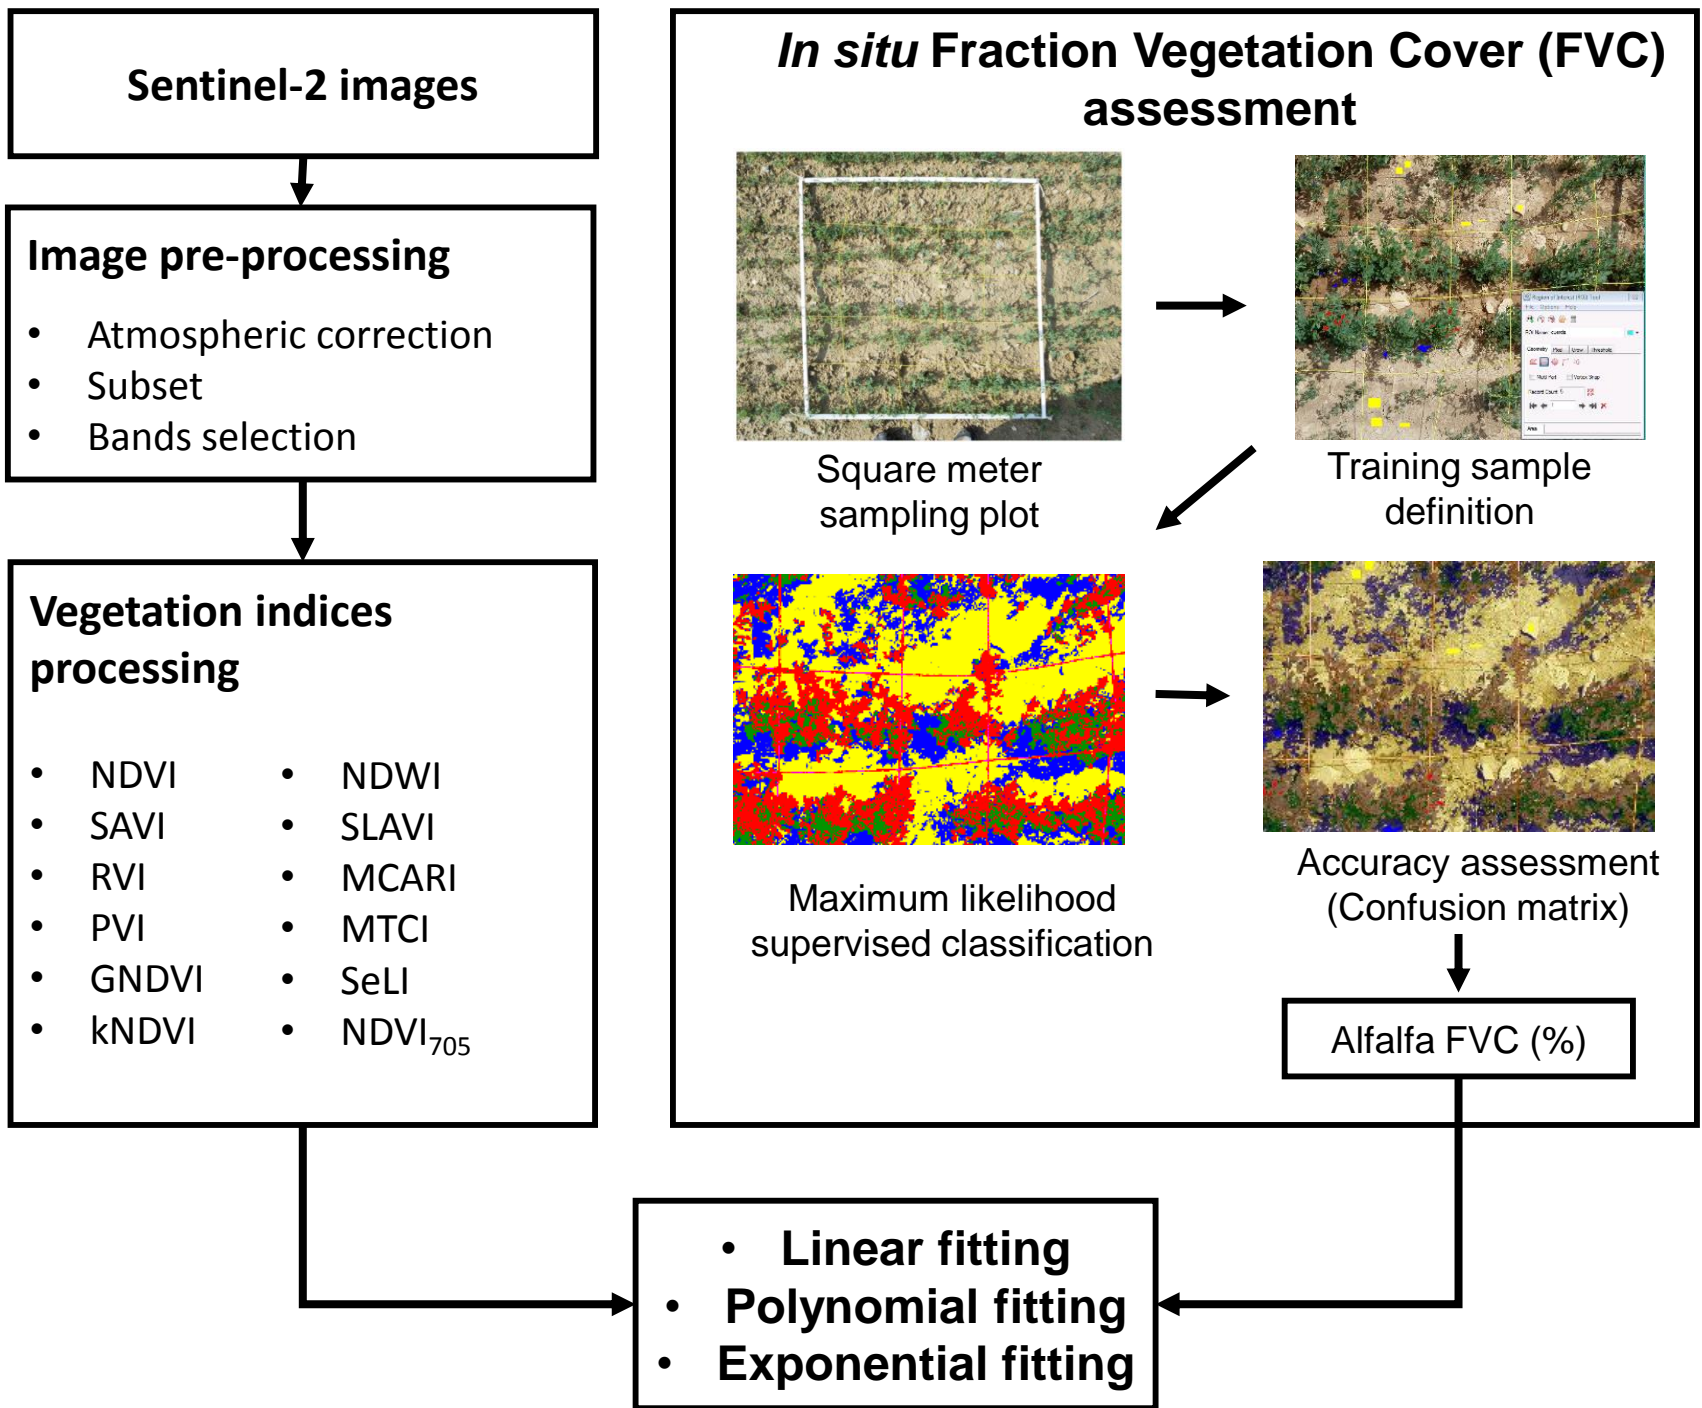

Supplement: s1 [file s1]
